# Supplementary material
Source: Springer Nature journal article supplement (https://www.springermedizin.de/resource/supplementary/12958_2003_36_MOESM1_ESM.pdf/9566230)

**Thy-1/CK**

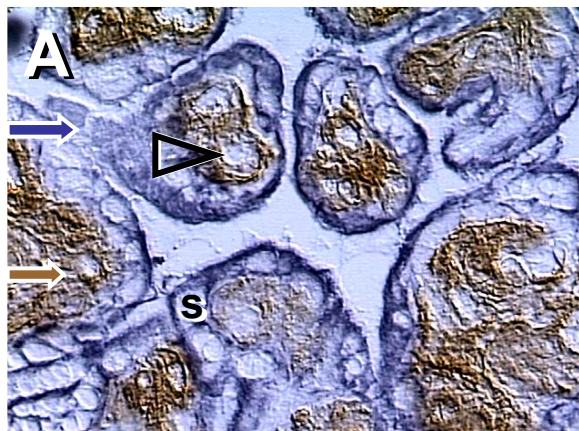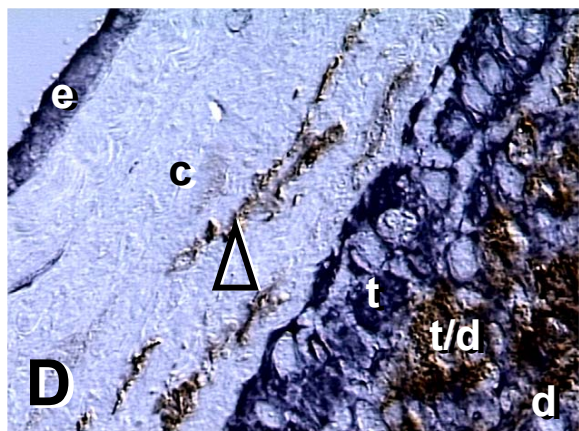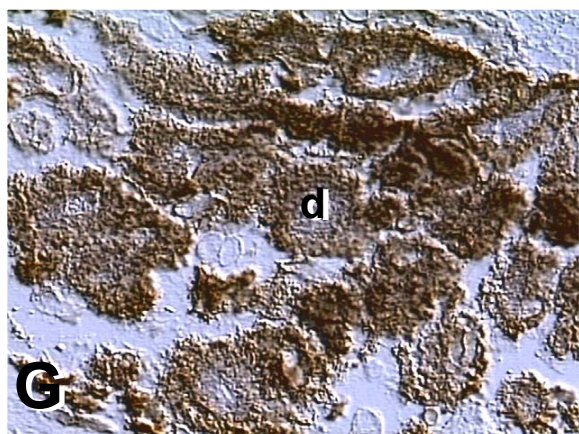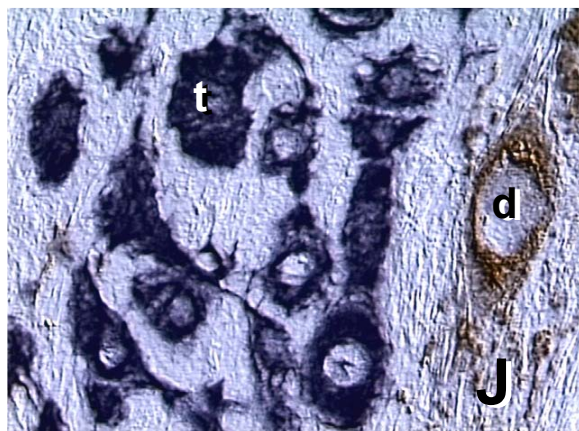

**ERβ**

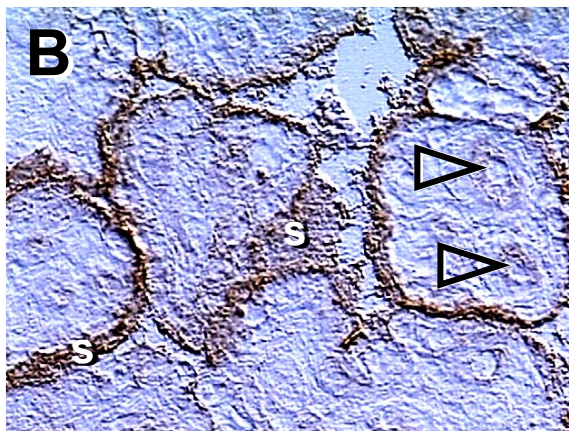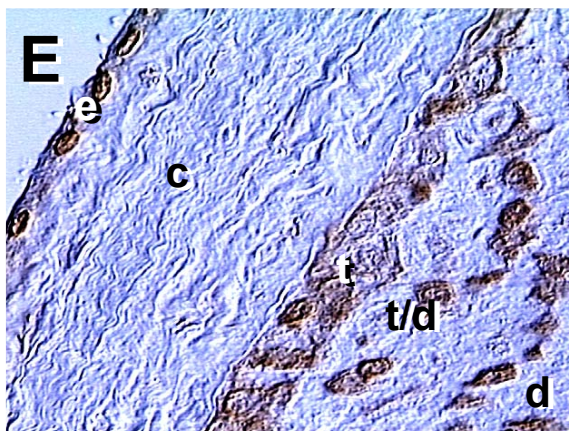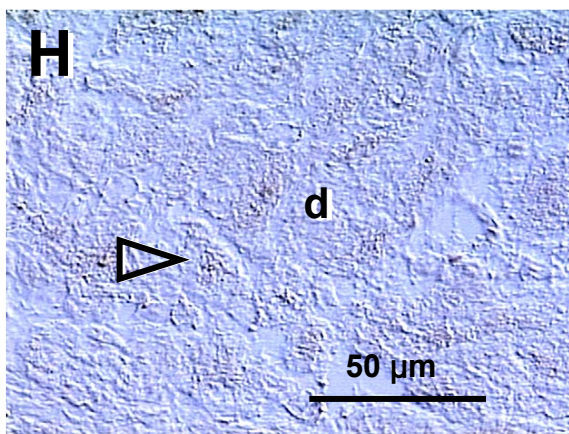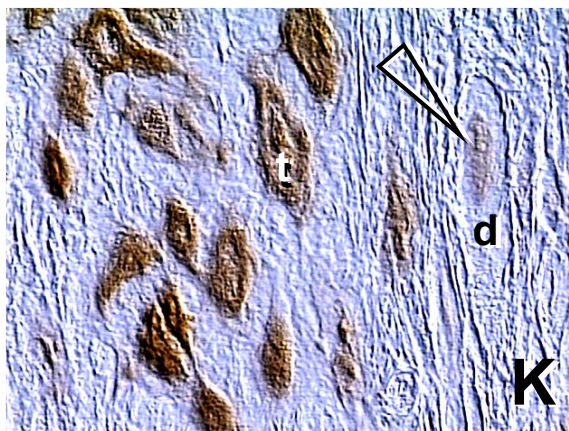

**ctr**

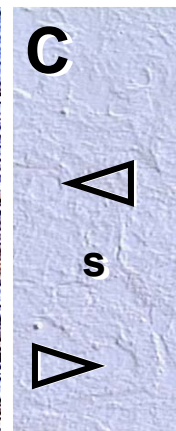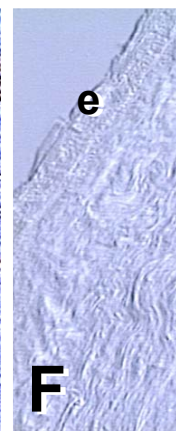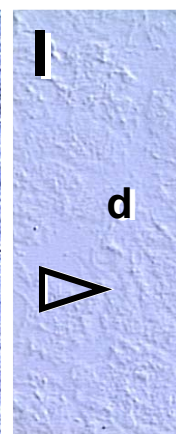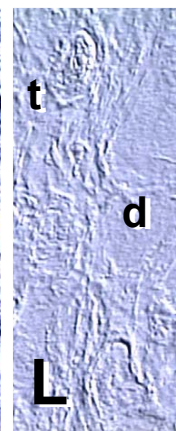

Supplement: MOESM1 [file 9566230]
